# Supplementary material for: Porous PbI2films for the fabrication of efficient, stable perovskite solar cells via sequential deposition
Source: Royal Society of Chemistry journal article supplement (doi:10.1039/c6ta03121h), 2016-01-01
Supplement: c6ta03121h1.pdf [file c6ta03121h1.pdf]

## Supporting Information

### **Porous PbI<sub>2</sub> films for fabrication of efficient, stable perovskite solar cells via sequential deposition**

Jie Cao,<sup>a</sup> Feng Wang,<sup>a</sup> Hui Yu,<sup>a</sup> Yang Zhou,<sup>a</sup> Haipeng Lu,<sup>a</sup> Ni Zhao<sup>\*a</sup> and Ching-Ping Wong<sup>\*ab</sup>

*<sup>a</sup>. Department of Electronic Engineering, The Chinese University of Hong Kong,  
New Territories, Hong Kong.*

*<sup>b</sup>. School of Materials Science and Engineering, Georgia Institute of Technology,  
Atlanta, Georgia 30332, United States.*

*\*E-mail addresses: nzhao@ee.cuhk.edu.hk,*

*cpwong@cuhk.edu.hk.*

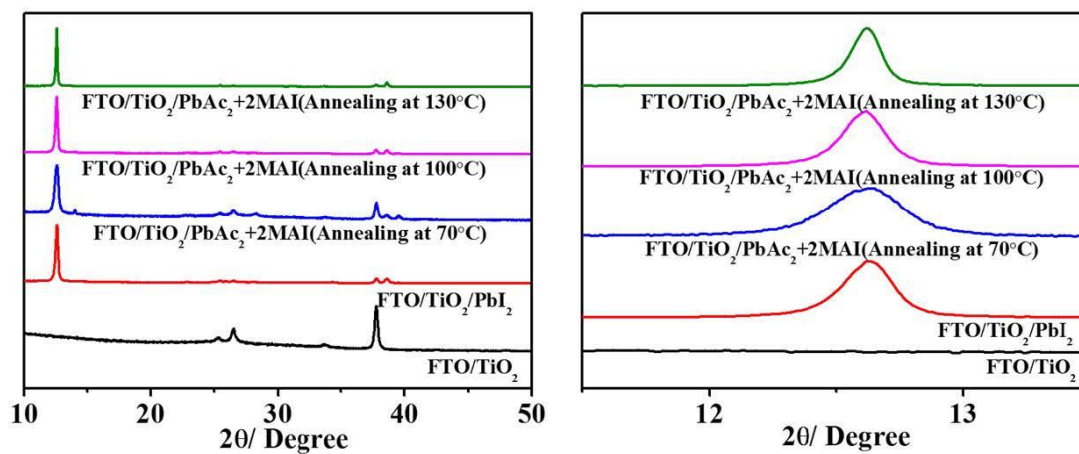

**Fig. S1** XRD patterns of the PbAc<sub>2</sub> + 2MAI precursor on the m-TiO<sub>2</sub> substrate under different annealing temperatures, the PbI<sub>2</sub> on the m-TiO<sub>2</sub> substrate and the TiO<sub>2</sub> substrate.

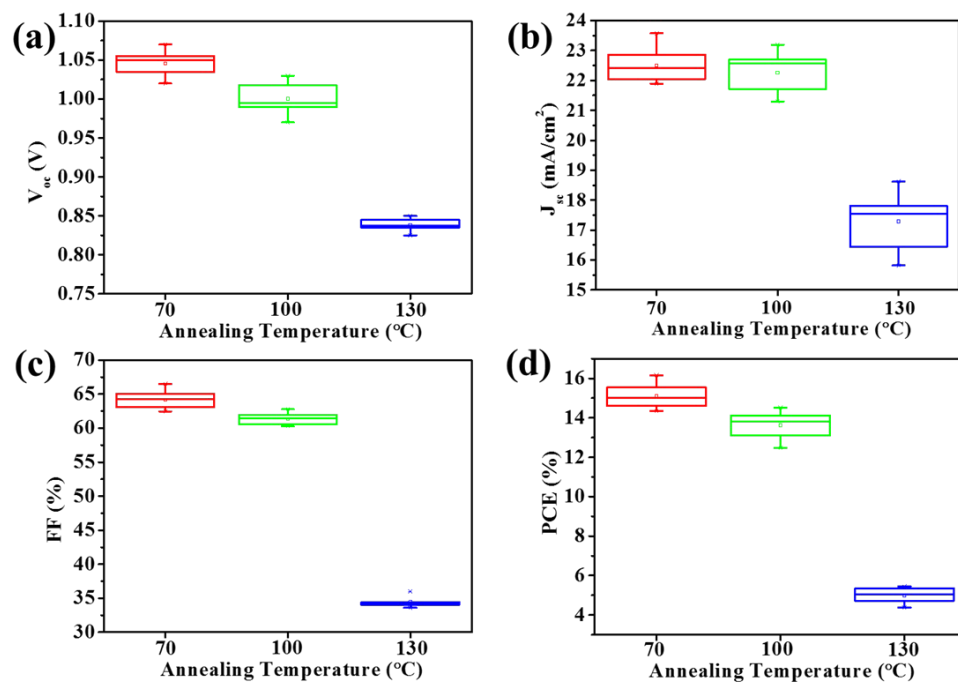

**Fig. S2** Comparison of the photovoltaic parameters between the PSCs fabricated from the p-PbI<sub>2</sub> annealed at 70 °C, 100 °C and 130 °C: a) open-circuit voltage  $V_{oc}$ ; b) short-circuit current density  $J_{sc}$ ; c) fill factor FF; and d) power conversion efficiency PCE.

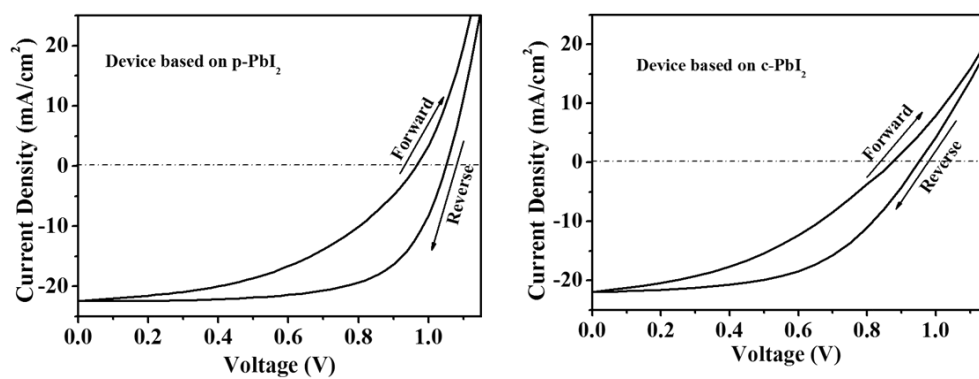

**Fig. S3** J-V curves of the devices fabricated from p-PbI<sub>2</sub> and c-PbI<sub>2</sub>

**Table S1** Photovoltaic parameters of perovskite solar cells fabricated from the precursor mixture of PbAc<sub>2</sub> and MAI with the molar ratio of 1:3.

|                                     | $V_{oc}$ (V) | $J_{sc}$ (mA cm <sup>-2</sup> ) | $FF$ (%)   | $PCE$ (%) |
|-------------------------------------|--------------|---------------------------------|------------|-----------|
| <b>PbAc<sub>2</sub> : MAI = 1:3</b> | 0.973±0.010  | 14.79±1.51                      | 43.64±0.92 | 6.28±0.75 |

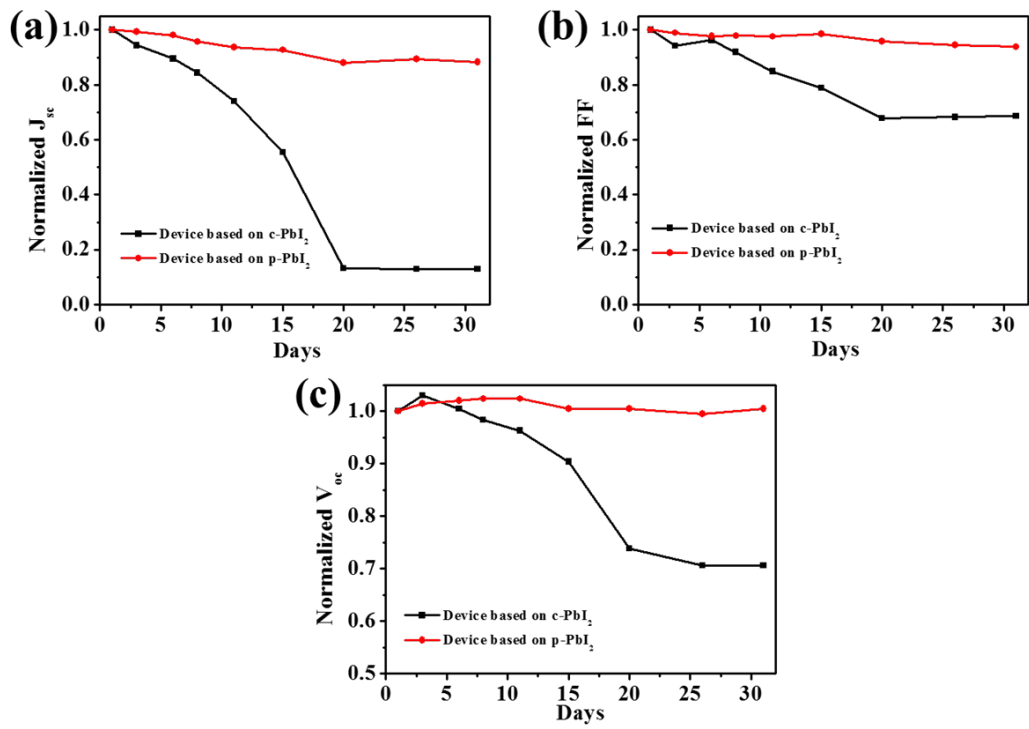

**Fig. S4** Stability of PSCs based on c-PbI<sub>2</sub> and p-PbI<sub>2</sub>: a) normalized  $J_{sc}$ , b) normalized FF, c) normalized  $V_{oc}$

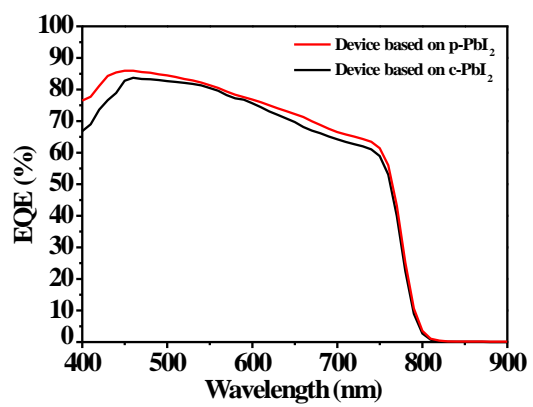

**Fig. S5** External quantum efficiency (EQE) spectra of PSCs based on c-PbI<sub>2</sub> and p-PbI<sub>2</sub>.
